# Supplementary material for: Identification and Functional Analysis of SabHLHs in Santalum album L
Source: MDPI journal article supplement (doi:10.3390/life12071017), 2022-07-08
Supplement: s1 [file s1]

**Table S1.** NCBI login numbers for transcription factors in *Santalum album*

| Genes   | NCBI login numbers |
|---------|--------------------|
| SaMYC1  | MZ297933           |
| SaMYC3  | MZ297935           |
| SaMYC4  | MZ297937           |
| SaMYC5  | MZ297938           |
| SabHLH1 | MZ297934           |
| SabHLH2 | MZ297936           |
| SabHLH3 | MZ297939           |
| SabHLH4 | MZ297940           |

**Table S2.** Premier information in *Santalum album*

| Premier names | Premier lists (5'→3')                     | Usages              |
|---------------|-------------------------------------------|---------------------|
| SaMYC1-ORF-F  | ATGGCTACTTCACTCCGACATCA                   | ORF                 |
| SaMYC1-ORF-R  | TCAGAACTTGTGGACAACACCAT                   | ORF                 |
| SaMYC3-ORF-F  | ATGAACCTGTGGAGTGACGACAA                   | ORF                 |
| SaMYC3-ORF-R  | CTACCGGGTTTCCGATAATTTGGAA                 | ORF                 |
| SaMYC4-ORF-F  | ATGGCTTCGCTGCCGCCACCGCC                   | ORF                 |
| SaMYC4-ORF-R  | TCATTCATGCGGAATTATTTGGTTT                 | ORF                 |
| SaMYC5-ORF-F  | ATGGAAGATGTGCTTGCTCTCCTCT                 | ORF                 |
| SaMYC5-ORF-R  | TTACTCTTCAAATCGTTTAATAAGA                 | ORF                 |
| SabHLH1-ORF-F | ATGGAGTTCAACAATGAGCATGGCT                 | ORF                 |
| SabHLH1-ORF-R | CTACAGGCACCTCCCGCCATACCT                  | ORF                 |
| SabHLH2-ORF-F | ATGGGAGAGTTAAGCACCGAGAGCA                 | ORF                 |
| SabHLH2-ORF-R | TCATCTATACAAGCATCCTCTGTAA                 | ORF                 |
| SabHLH3-ORF-F | ATGGCGAATAACCCCTTCTGAAGGT                 | ORF                 |
| SabHLH3-ORF-R | CTACGGAGGAGGATTAGTTTCGGGCT                | ORF                 |
| SabHLH4-ORF-F | ATGCTGTCCCAGGATAACACCAATT                 | ORF                 |
| SabHLH4-ORF-R | TTAGGCAACGGGGGACGGAGTACA                  | ORF                 |
| YFP-SaMYC1-F  | CTCAAGCTTCGAATTCATGGCTACTTCACTCCGACATCAG  | SaMYC1-YFP vector   |
| YFP-SaMYC1-R  | CTCACCATCAGGATCCTGAACCTTGTGGACAACACCATGA  | SaMYC1-YFP vector   |
| YFP-SaMYC3-F  | CTCAAGCTTCGAATTCATGAACCTGTGGAGTGACGACA    | SaMYC3-YFP vector   |
| YFP-SaMYC3-R  | CTCACCATCAGGATCCTCCGGGTTTCCGATAATTTGGA    | SaMYC3-YFP vector   |
| YFP-SaMYC4-F  | CTCAAGCTTCGAATTCATGGCTTCGCTGCCGCCACCGCC   | SaMYC4-YFP vector   |
| YFP-SaMYC4-R  | CTCACCATCAGGATCCTTTCATGCGGAATTATTTGGTTT   | SaMYC4-YFP vector   |
| YFP-SaMYC5-F  | CTCAAGCTTCGAATTCATGGAAGATGTGCTTGCTCTCCTCT | SaMYC5-YFP vector   |
| YFP-SaMYC5-R  | CTCACCATCAGGATCCTCTCTTCAAATCGTTTAATAAGA   | SaMYC5-YFP vector   |
| YFP-SabHLH1-F | CTCAAGCTTCGAATTCATGGAGTTCAACAATGAGCATGGC  | SabHLH2-YFP vector  |
| YFP-SabHLH1-R | CTCACCATCAGGATCCTCAGGCACCTCCCGCCATAC      | SabHLH2-YFP vector  |
| YFP-SabHLH2-F | CTCAAGCTTCGAATTCATGGGAGAGTTAAGCACCGAGA    | SabHLH2-YFP vector  |
| YFP-SabHLH2-R | CTCACCATCAGGATCCTTCTATACAAGCATCCTCTGTAAG  | SabHLH2-YFP vector  |
| YFP-SabHLH3-F | CTCAAGCTTCGAATTCATGGCGAATAACCCCTTCTGAAG   | SabHLH3-YFP vector  |
| YFP-SabHLH3-R | CTCACCATCAGGATCCTCGGAGGAGGATTAGTTTCG      | SabHLH3-YFP vector  |
| YFP-SabHLH4-F | CTCAAGCTTCGAATTCATGCTGTCCCAGGATAACACCAAT  | SabHLH4-YFP vector  |
| YFP-SabHLH4-R | CTCACCATCAGGATCCTGGCAACGGGGGACG           | SabHLH4-YFP vector  |
| 62S-SaMYC1-F  | TCTAGAACTAGTGGATCCATGGCTACTTCACTCCGACATCA | SaMYC1-62-SK vector |

|               |                                                  |                          |
|---------------|--------------------------------------------------|--------------------------|
| 62S-SaMYC1-R  | GACGGTATCGATAAGCTTTCAGAACTTGTGGACAACACCAT        | SaMYC1-62-SK vector      |
| 62S-SaMYC3-F  | TCTAGAACTAGTGGATCCATGAACCTGTGGAGTGACGACAA        | SaMYC3-62-SK vector      |
| 62S-SaMYC3-R  | GACGGTATCGATAAGCTTCTACCGGGTTCCGATAATTTGGAA       | SaMYC3-62-SK vector      |
| 62S-SaMYC4-F  | TCTAGAACTAGTGGATCCATGGCTTCGCTGCCGCCACCGCC        | SaMYC4-62-SK vector      |
| 62S-SaMYC4-R  | GACGGTATCGATAAGCTTTCATTCATGCGGAATTATTTGGTTT      | SaMYC4-62-SK vector      |
| 62S-SaMYC5-F  | TCTAGAACTAGTGGATCCATGGAAGATGTGCTTGTCTCCTCCT      | SaMYC5-62-SK vector      |
| 62S-SaMYC5-R  | GACGGTATCGATAAGCTTTTACTCTTCAAATCGTTTAATAAGA      | SaMYC5-62-SK vector      |
| 62S-SabHLH1-F | TCTAGAACTAGTGGATCCATGGAGTTCAACAATGAGCATGGCT      | SabHLH1-62-SK vector     |
| 62S-SabHLH1-R | GACGGTATCGATAAGCTTCTACAGGCACCTCCCGCCATACCCT      | SabHLH1-62-SK vector     |
| 62S-SabHLH2-F | TCTAGAACTAGTGGATCCATGGGAGAGTTAAGCACCGAGAGCA      | SabHLH2-62-SK vector     |
| 62S-SabHLH2-R | GACGGTATCGATAAGCTTTCATCTATAACAAGCATCCTCTGTAA     | SabHLH2-62-SK vector     |
| 62S-SabHLH3-F | TCTAGAACTAGTGGATCCATGGCGAATAACCCCTTCTGAAGGT      | SabHLH3-62-SK vector     |
| 62S-SabHLH3-R | GACGGTATCGATAAGCTTCTACGGAGGAGGATTAGTTTCGGGC<br>T | SabHLH3-62-SK vector     |
| 62S-SabHLH4-F | TCTAGAACTAGTGGATCCATGCTGTCCCAGGATAACACCAATT      | SabHLH4-62-SK vector     |
| 62S-SabHLH4-R | GACGGTATCGATAAGCTTTTAGGCAACGGGGGGACGGAGTACA      | SabHLH4-62-SK vector     |
| GAD-SaMYC1-F  | GAGGCCAGTGAATTCATGGCTACTTCACTCCGACATCAG          | SaMYC1-pGADT7<br>vector  |
| GAD-SaMYC1-R  | GAGCTCGATGGATCCCGAACTTGTGGACAACACCATGAAG         | SaMYC1-pGADT7<br>vector  |
| GAD-SaMYC3-F  | GGAGGCCAGTGAATTCATGAACCTGTGGAGTGACGA             | SaMYC3-pGADT7<br>vector  |
| GAD-SaMYC3-R  | CGAGCTCGATGGATCCCCCGGGTTTCCGATAAATTGG            | SaMYC3-pGADT7<br>vector  |
| GAD-SaMYC4-F  | GGAGGCCAGTGAATTCATGGCTTCGCTGCCGCCACCGCC          | SaMYC4-pGADT7<br>vector  |
| GAD-SaMYC4-R  | CGAGCTCGATGGATCCCTTCATGCGGAATTATTTGGTTT          | SaMYC4-pGADT7<br>vector  |
| GAD-SaMYC5-F  | GGAGGCCAGTGAATTCATGGAAGATGTGCTTGTCTCCTCCT        | SaMYC5-pGADT7<br>vector  |
| GAD-SaMYC5-R  | CGAGCTCGATGGATCCCCTCTTCAAATCGTTTAATAAGA          | SaMYC5-pGADT7<br>vector  |
| GAD-SabHLH1-F | GAGGCCAGTGAATTCATGGAGTTCAACAATGAGCATGG           | SabHLH1-pGADT7<br>vector |
| GAD-SabHLH1-R | GAGCTCGATGGATCCCCAGGCACCTCCCGCCATACCCTG          | SabHLH1-pGADT7<br>vector |
| GAD-SabHLH2-F | GGAGGCCAGTGAATTCATGGGAGAGTTAAGCACCGAGA           | SabHLH2-pGADT7<br>vector |
| GAD-SabHLH2-R | CGAGCTCGATGTTCTATAACAAGCATCCTCTGTAAAG            | SabHLH2-pGADT7<br>vector |
| GAD-SabHLH3-F | GGAGGCCAGTGAATTCATGGCGAATAACCCCTTCTGAA           | SabHLH3-pGADT7<br>vector |
| GAD-SabHLH3-R | CGAGCTCGATGGATCCCCGGAGGAGGATTAGTTTCGG            | SabHLH3-pGADT7<br>vector |
| GAD-SabHLH4-F | GGAGGCCAGTGAATTCATGCTGTCCCAGGATAACACCAA          | SabHLH4-pGADT7<br>vector |
| GAD-SabHLH4-R | CGAGCTCGATGGATCCCCGCAACGGGGGGACG                 | SabHLH4-pGADT7<br>vector |

---

**Table S3.** The cluster multiple sequence alignment of SabHLHs in *Santalum album*

|                                                                                                                                                                                                                                                                                                                                                                                                                                                                                                                                                                                                                                                                                                                                                                                                                                                                                                                                                                                                                                                                                                                                                                                                                                                                                                                                                                                                                                                                                                                                                                                                                                                                                                                                                                                                                                                                                                                                                                                  |         |        |           |
|----------------------------------------------------------------------------------------------------------------------------------------------------------------------------------------------------------------------------------------------------------------------------------------------------------------------------------------------------------------------------------------------------------------------------------------------------------------------------------------------------------------------------------------------------------------------------------------------------------------------------------------------------------------------------------------------------------------------------------------------------------------------------------------------------------------------------------------------------------------------------------------------------------------------------------------------------------------------------------------------------------------------------------------------------------------------------------------------------------------------------------------------------------------------------------------------------------------------------------------------------------------------------------------------------------------------------------------------------------------------------------------------------------------------------------------------------------------------------------------------------------------------------------------------------------------------------------------------------------------------------------------------------------------------------------------------------------------------------------------------------------------------------------------------------------------------------------------------------------------------------------------------------------------------------------------------------------------------------------|---------|--------|-----------|
| 1.                                                                                                                                                                                                                                                                                                                                                                                                                                                                                                                                                                                                                                                                                                                                                                                                                                                                                                                                                                                                                                                                                                                                                                                                                                                                                                                                                                                                                                                                                                                                                                                                                                                                                                                                                                                                                                                                                                                                                                               | SaMYC1  | 1800kb | g11854.t1 |
| <p>ATGGCTACTTCACTCCGACATCAGGAGGAAGTGCCACAAAACCTAAAAAATCAGCTTGCTGTTGTAGTTAGAAGCATTCAATGGAGCT<br/> ATGCAGTCTTCTGGTCCACTTCAAGTAGACAACCAGGGGTGTGGAATGGGGAGATGGGTACTACAATGGGGATATTAAGACGAGGAA<br/> AACAGTTCAGGCTGTGGAGCTTAACGCGGTCCAAATGAATTCGCAGCGAAGCGAGCAGTTGAGAGAACTCTACGAGTCCCTTGTGTG<br/> GGTGAAACCAGCCCACAAGCTCGGAGGCCAACGGCTGCATTGTCCCCTGAAGACCTAACCGATACTGAATGGTTTTACTTGGTTTGCAT<br/> GTCCTTTGTATTTAACATTGGCCAAGGTTTGCCGGGAAGAGCATTGGCCAATGGTCAACCCATCTGGGTCTGTAACGCTCCCTTTCGAGA<br/> TAGTAAAGTATTACGCCGTTCTCTGCTAGCTAAGAGTGCCGCTATTAGACTGTTGTATGCTTTCCATTTTTAAAGGAGTGCTGGAGCT<br/> GGGTGTGACTGAGCAAGTCGCGGAGGATCCTGGTCTCATTAGGGCATAAAAACTACTTTGTTGGAGAATCCATACCTCTCAAGTACTG<br/> ATGACAATCCAGCTTTCATTGACCTGGATTATAAGATTTGAACAGCATTCTTAGCCCAGTTTCTGAATGCGAGGAAGTCAAAACTGATT<br/> CTCCTAATCAGACCACAGATTGGATTGAACCCATTCAACAAAGAGAGGAGTCTTTATGGTTGAAGGGATCAATGGGGGTGCTTCTTCT<br/> CAAGTACAAAGTTGGCATTTTATGGACGATGATTCGCTGCTGATAACCATAATCCCTGAACCTCTGGCGATTGTGTATCTCAAACTTT<br/> GTAAATCCTGAAAAAATTATCACTGCTACAAATCAGAAGAGACTGACCCCACTGGATCTTCGGAGCAATGACGTACATTATCAGGGAG<br/> TTCTTGGAGCCCTTCTGAAGAGTTCTACCAATTGGTCTTAGGACCACACTTCAGAAATTGTAACAAGGAGTCTAGTTTGTAGTTGGA<br/> GAAAAGGATTGGTAAATTTCCAGAAGCCGAGAAATGGAGCCTGCCAGAAATTACTGAAGAAGGTATTGTTTCAGGTGGCCCAAATGC<br/> ATGGTGGCATTTCCTGAAGTCTGTGAAGATGATGGCATTAAAGGATGAACCTTGGAGACCAGAGGCTGATAAAAAATAGAATGTGTTG<br/> CACGGAGAAAAATAAACGAAAAGCTTATTATTCTCAGATCGTTGGTCCCCTCGATTAACAAGGTTGACAGGGTTTCTACACTTGATGACA<br/> CTATAGAGTACCTGAAAAGAGCTTAAGAAAAAGTTGATGACTTGGAATTTTTAGAGAACAATAACATCTCCAGATACCATAGAGAG<br/> AACATCAGATAATCGTGGAATGGCAAAATCGGTAGTGAAGGAGGCCATCGATAAATAAGAGGAAGGCTGTGAATGCAATGAGAT<br/> TTCTGAGATTGACTTGATTTAATGAAAGATGGTGAACAGATGATTGAATATAAGCATCATTGAGAAGGATGTGCTGATTGAAATCA<br/> GGTGCCCATGGAGGGAGTGCTTGTGTTTCGAGATCATGGATACGCTAAGCAATCTACATTGGATACTCACTCGGTACAATCATCTAAT<br/> GTTGATGGAATTTTACACTGACCATTAATCTAAGCACTTGAAGGGTTCACCTGCTAATGTAACAGTGAGGATGCTCAGAGAACTACT<br/> TCATGGTGTGTCCACAAGTTCTGA</p> |         |        |           |
| 2.                                                                                                                                                                                                                                                                                                                                                                                                                                                                                                                                                                                                                                                                                                                                                                                                                                                                                                                                                                                                                                                                                                                                                                                                                                                                                                                                                                                                                                                                                                                                                                                                                                                                                                                                                                                                                                                                                                                                                                               | SabHLH1 | 999kb  | g17775.t1 |
| <p>ATGGAGTTCAACAATGAGCATGGCTTCTTTGAAGAGTTACTTCCCTGAGAAGAGACAATGCTAGCTGGGTGAAACCATCCCCACCAC<br/> AGGAATGTCTGAATCTGCCCAATCCCAGCAGTTTCGAGGACTTCTACGAATACCCAAATGAGATCACTTCCCTCATTTCTACTTCTCC<br/> TTCCCTGGAGTCCCTTCTGCTCCGTTCTCGAGCAGGGCCTGTTGAGTACCCAGCAGTGAGCTCTGCTGCCCGTTTGGGGACGGTTT<br/> CTCGGCGATGGAAGTTACCGATATGCCCCGTTCCCCGGGCAGGGGTGGAGGACGATTCGGGCGGGGTCGAGCCGGGACTGGACCG<br/> GAGGGGGGCTTGAGATGTTGACGCATGTAAAGTGGAGCCGGTCAGGGATCCGAAACCGCGGTTTTCGACATCGGGTCTGCCTCG<br/> ATCGGAAGAGCAACCGAGGGAAGAAGGTGGAGGGGCAGCAGTCAAGAATCTTATGGCGGAGAGGCGGCGGAGGAAGCGGCTGAAT<br/> GATCGGCTCTCGATGCTCCGATCCGTCGTTCCAAAAATAAGTAAGATGGACAGGACATCTATCCTTGGGGACCCATAGATTACATGA<br/> AGGAGTTGCTAGAGAAAATCAACAATCTGCAAGAAGAATCAGATGTGGACTCCAAGCAGCTGGACTTGATGGGTATATTCAAGGACA<br/> TAAAGCCCAATGAAATCTAGTCAGAAACTCACCAAGTTTCGATGCGGAAAGGAGGAACCTCGGATACCCGGATCGAGATTGTGTCAC<br/> CGGAAGCCTGGATTGTTGCTGTCTACTATGACGACGCTCGAGGCATTAGGCCTTGAAATCGAGCAGTGTGTCATAAGCTGCTTTAACG<br/> ATTTTGGCTCCATGCTTCGTGCTCAGAGGATTCGGAGCAAAGAACAGTAATAAGCTGTGAAGACATAAAGCAAGCGTTATTTAGGAA<br/> TGCAGGGTATGGCGGGAGGTGCCTGTAG</p>                                                                                                                                                                                                                                                                                                                                                                                                                                                                                                                                                                                                                                                                                                                                                                                                                                                                                     |         |        |           |
| 3.                                                                                                                                                                                                                                                                                                                                                                                                                                                                                                                                                                                                                                                                                                                                                                                                                                                                                                                                                                                                                                                                                                                                                                                                                                                                                                                                                                                                                                                                                                                                                                                                                                                                                                                                                                                                                                                                                                                                                                               | SaMYC3  | 2022kb | g7080.t1  |
| <p>ATGAACCTGTGGAGTGACGACAACGCGTCGATGATGGAAGCTTTCATGAGCTCTGAACTCTCCTCCTACGGGTGGGCCCCCTCAGTCCTC<br/> CTCGTCCGTCGCCTCCACCTCCACCCCGCTCCTCCTCCTCCTCCTCCGCTACCGACGGCTCCTCCTCCGACCACCGCCGGCGTGGG<br/> ACAGTCTCAAGCTCCTCCCATGGCGTTCTTCAACCAGGATACCTTGACAGCAGCGGCTCCAGACCCCTATCGAGGGCGCCCGGAGAGCT<br/> GGACCTACGCCATCTTCTGGCAGTCTCGGTTGATTTCTCCGGCGCCGCCCTGTTGGGGTGGGGCGATGGCTACTACAAGGGGGAGGAG<br/> AACAAGTGCGGTGGCGGGGGGAAGCGCCGAAGGCTAAGCAACCCCGCCACCGCCCGGAGCAGGAGCACCGCAAGAAGGTCCTCCG<br/> CGAGCTCAACTCCCTCATCTCCGGCGCTCCGCATCGGCTGCCGCCGTCGACGATAACCGTCGACGAGGAGGTACCGACACCGAGTGG<br/> TTCTTCTCGTCTCCATGACGAGTCTTCGCCAGCGGGATGGGTCTCCCGGTGAGGCCTTCTTACCTCCAACCCCGTCTGGCTCGCC</p>                                                                                                                                                                                                                                                                                                                                                                                                                                                                                                                                                                                                                                                                                                                                                                                                                                                                                                                                                                                                                                                                                                                                                                                                                                                                                                    |         |        |           |

GGTCCGGAACGCCTCTCCGGTTCGACCTGCGAGCGCGCGACAGGGGATGGGCTTCGGCCTTCGGACGATGGTGTGCATCCCCGTGGT  
GAACGGGGTCGTGAACTGGGGTCCACGGAGTTGATTCTCCAGACGCCAGATCTGATGAACAAGGTTAGGGTTCTGTCAATTCAGTA  
GTTCCGAGATCAGCTCGTGGCCAATTCATGGCGATCAGCGCGAGAACGAACCCCACTCCGCAATCTGGGTTCCCGACCAACCCACCTCC  
TCCCTCCTCCGCCGTGAAATTAGGGATTCTGTAAGCGCCGACCACCACCAATCCCACTCCCAATCACAATTCCAATCCCAGTT  
CGAGTACCCTAACCGATCTAAACCCTAACCTAGTTCTTCAAATGTAAAATCCACACCTACCCGGCGCGGTTGGTAACGACCCCGCG  
CCGGCGCCACTGCAGACGAAAGCTTCTCAGAGGGAGATAAATTCGCCGAATTCGGGTACGAGGGAAGCGCGCGCGGGAGTG  
AGGACCGCGGGTGCAAGCCGAGTCGGGAGAAATCTGAATTCGGGGAGAGTAAGAGGAGCTCGTGAATGGGAATGGGAGTTTA  
TTCTCCGGCCACCCTCAGCTCGTAGCCGAGGAGAATTGTCGGAAGGGCGGTCTCCGGCGTCGCGAGGTAGCAACGAGGAGGGAATG  
CTGTCTTCTCCGGGATGGTGAATCCACCGCGCGCGCGCGGATTTCGGACCAGTCCGATCTCGAGGCCTCGGTTGTGGTCAGAGAAAC  
TGACAGTAGCAGAGTGGTGGATCCCCGAGAAACGCCCCGGAACGGGGACGAAAGCCCGCAACGGGAGGGAGGAGCCGTTGAACC  
ACGTCGAGGCGGAGCGGCAGCGCGCGAGAAGCTTAACCAGAGATTCTACGCGCTCCGCGCCGTCGTCCCCAACGTCTCGAAGATGG  
ACAAGGCGTCCCTCCTGGGCGACGCCATCGCGTACATTAACGAGCTCCGCACCAAGGTCCAGACCGCGGTCTCCGAGAAGGAAGAGTT  
GCAGAAAGAGGTGGCGGGGTGAAGAAGGAGAAAGCAGTTCCTCCCCGAACAACACCCCCCTAAATCGTCGGACCATTGGCGGGGA  
GAAGTTGGTGGACATTGAAATCGACGTGAAGATCATCGGTTGGGACGCGATGATCAGAATACAATGTAGTAAGAGGAATCATCCGGC  
GGCGAAGTTGATGGCGCGGTTGAAAGAGCTGGATTGGATGTTACCATTGCGAGCGTTTCTGTAGTGAAAGATTTGATGATACAGCAA  
GCAACATTGAAGATGGGGAGCCGATTTACACGCAGGAACAGCTCAAAATGGCCTTATCTTCAAATTATCGGAAACCCGGTAG

4. SabHLH2 1302kb g31888.t1

ATGGGAGAGTTAAGCACCGAGAGCACTTCTCTTGCTATTTCTTCTCTTCGGCTCACAACTGGTGGGATCTCCATTCAACCTCATGG  
AACCTAGTGTCATACCCATAACCCCTTGGAACTCTTTGAACCCTAGTTCCAATTCCTCCACTTGTGAGGAGGATGTTTCGATCTCCACA  
TCGTTACCAACGGTTCCAATCACTCCGGCGTGAGCGTCGATTCTCTCACCAGTTCGGTGAATCCCATGAGTTGATTGGAGAAATCGT  
GTCCGATAATCATATGTGGAACCATGTTCTCTTAAGCAGCGGTGGTGGCGATCATGGGATGATGTTCCAGTTACCTCAGAAACAATACT  
GGGAGTTCTTAACACCAATTACTTTGACAAAACGCACCACTTGAATGGATTCATCCACAGCGACATAACAAGCAATGAAAATGAAAG  
CAACAATAGTAAGAATCTCTTAATTTGGTCAGCAATTGGTCCATTGCTCCTCCATGCCCCACAAGCCGACCATCTCGATCCCCAACCGT  
ACGATAATCAGGGTCTGTTTTTGCACTCCGGCGACACAAAATCGATCCGCAGGGATGACAGCAGTGGTGGTTTATTACAGAGGTTGCAG  
GCAGCGCGCCGTCATTGGATGCGAATTATGGTGTAGTGAAAGTTGTTACTATGGTGGTGGCCTTGAAGACAATAATAATGGGAGAA  
AATTATGTGATGTTATATCATTTAGTGGTAGTAGCAATGGTGTGAAGCCCAGCTGCCAGAAATCCTGAATTTATCAGCTGGGTGGAGG  
AAGCAAGGTCTCTTTACTTCTAATTCCCAGTGAAAAACAGTGGAAGAAGACAGATCATCAACAATGAAGTAAAGAAGAGAAGATCA  
AACAGCAATAGTTTCAGAGACGCTCCCCAAAAAGCAAAAGCATGAAAGCAGTGCAGTTTCATCGGTAAAGATCATGGCACCAAAAAGTC  
AAGCTTGGGGACAAGATCAGTGCTCTTCAGCAAATTTGTGTCACCATTGGAAAGACAGACACAGCGTCTGTGTTATTAGAAGCAATCG  
GATACATAAGGTTTCTACAAGAGCAAGTGACGCTGCTTAGCAATCCTTACATGAAGACTATGCCATGCAAGGATCCATGGGGAGCTCT  
GGACAGAAAAGAGCAAGGAGATGCAGAATTGGACCTTCAGAGTAGAGGTCTTTGTTAGTTCCAACTCTTGACCCCTCAAACGTAT  
CATGAGAATGGGGTTGGATCAGATTATTGGACACCCACTTACAGAGGATGCTTGATATAGATGA

5. SaMYC4 2151bp g13570.t1

ATGGCTTCGCTGCCGCCACCGCCCGCCGCACTGAGCACTCGATTGCAGTCCATGTTACAGACCGCAGTCCAATCCGTGCAGTGGACTTA  
CAGTCTCTTTTGGCAGTTTGTCCGCAACAAGGGATTCTGGTGTGGGGGATGGGTACTACAATGGGGCAATAAAGACGAGGAAGACG  
GTGCAACCGGTGGAGGTGAGCACGGAGGAGGCGTCGCTGCAGCGGAGCCAGCAACTCCGAGAGCTCTACGACTCGTTATCGGCCGA  
GACACGAACTCGCAGCAGCCGCTCGCCGCCCTCCGCCTCGTTGTCGCCGAGGACTTGACCGAGTCGGAGTGGTTCTATCTCATGTG  
TGCTCCTTCTCTTTCTCCCGCATCGGGTTGCCGGGAAAGCATATTCAAAGAGGCAGCATGTGTGGCTTACGGGAGCAAACGAGG  
TTGACAGCAAAGTGTCTTCTAGAGCTATTCTTGCTAAGAGTGCTCGCATACAGACTGTGATGTGCATTCTCTATTAGACGGGTCTGTTG  
AGCTTGGCACACAGACAAGGTGCAAGAGGACCACGGATTGATCCGCCGAGTGAAAAGCGTCTTACGAACCACAGCAATGATCCCC  
CTCCTCCCAAGCCGGCCCTCTCCGAGCACTCCACTTCCAATCCCGTCTCTCTGCCCGCCCTCCACCCACATTGTACGCAGGTGCCG  
CAGCAGCAGACCCGGACGGAGAAGAAGAAGAAGAGAGACGACGATGACGACGATGATGATGACGACGAAGACGACGGAGGAGG  
AGGAGGAGGAGGAGGAGCCGAGTCGGAATCAGAAGCCGGGAACGGGCAGAAACAATGGATTCTCGGTACGGCATGTGGAGGCCA  
TGGGGGTGGGGACGGCCGAGCCGAGCGAGCTCATGCAGCTCGAGATGTCGGAGGATATTCGGATTGGCTCGCCCGATGACGGGTCTGA  
ACAACCTCGACTGCGACTTCCACTTGCTCGCGTGCTCAGTCGGAGACCCGACGGCGGAGGCGGATCTTACGCGCCGGGTGACTC  
GTACAGGGCTGAGTCGAGCCGAGGTGGCCGACGGTGCCGAAATGGGTATTACTGCGATGATTAAACCGCCACCTTCAGGTGGAGA

|    |        |        |           |
|----|--------|--------|-----------|
| 6. | SaMYC5 | 1542bp | g18261.t1 |
|----|--------|--------|-----------|

|    |         |       |           |
|----|---------|-------|-----------|
| 7. | SabHLH3 | 927kb | g13803.t1 |
|----|---------|-------|-----------|

|    |         |       |          |
|----|---------|-------|----------|
| 8. | SabHLH4 | 708kb | g2451.t1 |
|----|---------|-------|----------|

ATGCTGTCCCAGGATAACACCAATTGGCTGTTGATTACGGATTGATCGAGGATATCGCTGCACCAGACGGGAATTTCCCTGCTCCGGC  
TTCGGGCTTCACTGGCCATTACAGGCCCGGAATGATCCTCCTTATCTCGGTGTTGATGTCGATGGCTCACTCGGGGATTAGATTGTCC  
CAAAGAAACAGGCTCAAAAAAGAGGGGGAGATCTGAACCATCTGGCCCTTCTAGTTCCAAAGCATGTAGGGAGAAGCTGCGGAGGGA  
TAGGCTAAACGACAAGTTTTTGGAGCTGGGTCTATTCTGGACCCTGGAAGGCCTCTAAAAACAGACAAGGCTGCTGTTTTGGTTGATG  
CGGTAAAAATGGTGACTCAGTTACGGGGTGAAGCCCACAAGCTAAAGGACTCCAATTACAGATCTCCAACAGAAGATTAAGGAGTTGAA  
GGCTGAGAAGAATGAGCTGCGTGATGAGAAGCATCGATTGAAGACTGAGAAGGAAAAGCTAGAGCAACAGATGAAAGGCATGAATG  
CTCAACCCAGTACCTCCCCCACCTGCCATTCCCCTGTCATATACTGCTCAAGGTCAACCCGGCGGAAACAAGTTGGTGCCTTTCATT  
GGTTACCCGGGAGTCGCTATGTGGCAGTTCATGCCACCCGCTGCGGTAGACACCTCTCAGGATCATGTACTCCGTCCCCCGTTGCCTA  
A

**Table S4.** Yeast one-hybrid experimental genes synthesis sequences in *Santalum album*

| Transformation lists name | Lists (genes 5'→3')                                                                                           |
|---------------------------|---------------------------------------------------------------------------------------------------------------|
| <i>pAbAi-SSy1G-box-F</i>  | AATATAGAGTAACGTGCTAAGACTATAATATAGAGTAACGT<br>GCTAAGACTATAATATAGAGTAACGTGCTAAGACTAT                            |
| <i>pAbAi-SSy1G-box-R</i>  | ATAGTCTTAGCACGTTACTCTATATTATAGTCTTAGCACGTT<br>ACTCTATATTATAGTCTTAGCACGTTACTCTATATT                            |
| <i>pAbAi-mSSy1G-box-F</i> | AATATAGAGTCCAACGCTAAGACTATAATATAGAGTCCAAC<br>GCTAAGACTATAATATAGAGTCCAACGCTAAGACTAT                            |
| <i>pAbAi-mSSy1G-box-R</i> | ATAGTCTTAGCGTTGGACTCTATATTATAGTCTTAGCGTTGGACTCTATATTATAGT<br>CTTAGCGTTGG ACTCTATATT                           |
| <i>pAbAi-CYP1G-box-F</i>  | TTGATAGATATACGTGCACCTATAAGTTGATAGATATACGTGCACCTATAA<br>GTTGATAGATATACGTGCACCTATAAG                            |
| <i>pAbAi-CYP1G-box-R</i>  | CTTATAGGTGCACGTATATCTATCAACTTATAGGTGCACGTATATCTATCAACTTAT<br>AGGTGCACGTATATCTATCAA                            |
| <i>pAbAi-CYP2G-box-F</i>  | GTGTCCGAGCCACGTTACGGTTTGGGGTGTCCGAGCCACGTTACGGTTTGGGGTGT<br>CCGAGCCACGTTACGGTTTGGG                            |
| <i>pAbAi-CYP2G-box-R</i>  | CCCAAACCGTAACGTGGCTCGGACACCCCAAACCGTAACGTGGCTCGGACACCCC<br>AAACCGTAACGTGGCTCGGACAC                            |
| <i>pAbAi-CYP3G-box-F</i>  | TAATTTGAAGCACGTGAATTTGGCATTAAATTTGAAGCACGTGAATTTGGCATTAAAT<br>TGAAGCACGTGAATTTGGCAT                           |
| <i>pAbAi-CYP3G-box-R</i>  | ATGCCAAATTCACGTGCTTCAAATTAATGCCAAATTCACGTGCTTCAAATTAATGC<br>CAAATTCACGTGCTTCAAATTA                            |
| <i>pAbAi-CYP4G-box-F</i>  | TCCCACCCACGTAGCTTCGCCCACGTTTGAATCATCCCACCCACGTAGCTTCGCC<br>CACGTTTGAATCATCCCACCCACGTAGCTTCGCCCACGTTTGAATCA    |
| <i>pAbAi-CYP4G-box-R</i>  | TGATTCCAAACGTGGGCGAAGCTACGTGGGTGGGATGATTCCAAACGTGGGCGAA<br>GCTACGTGGGTGGGATGATTCCAAACGTGGGCGAAGCTACGTGGGTGGGA |
| <i>pAbAi-mCYP3G-box-F</i> | AATTTGAAGTCAACGAATTTGGCATTAAATTTGAAGTCAACG<br>AATTTGGCATTAAATTTGAAGTCAACGAATTTGGCAT                           |
| <i>pAbAi-mCYP3G-box-R</i> | ATGCCAAATTCGTTGACTTCAAATTAATGCCAAATTCGTTGACTTCAAATTAATGCC<br>AAATTCGTTGACTTCAAATTA                            |
| <i>pAbAi-mCYP4G-box-F</i> | TCCCACCATTTAAGCTTCGCCTTAATCTGGAATCATCCCACCATTTAAGCTTCGCCT<br>TAATCTGGAATCATCCCACCATTTAAGCTTCGCCTTAATCTGGAATCA |
| <i>pAbAi-mCYP4G-box-R</i> | TGATTCCAGATTAAGGCGAAGCTTAAATGGTGGGATGATTCCAGATTAAGGCGAA<br>GCTTAAATGGTGGGATGATTCCAGATTAAGGCGAAGCTTAAATGGTGGGA |

Supplementary Figures

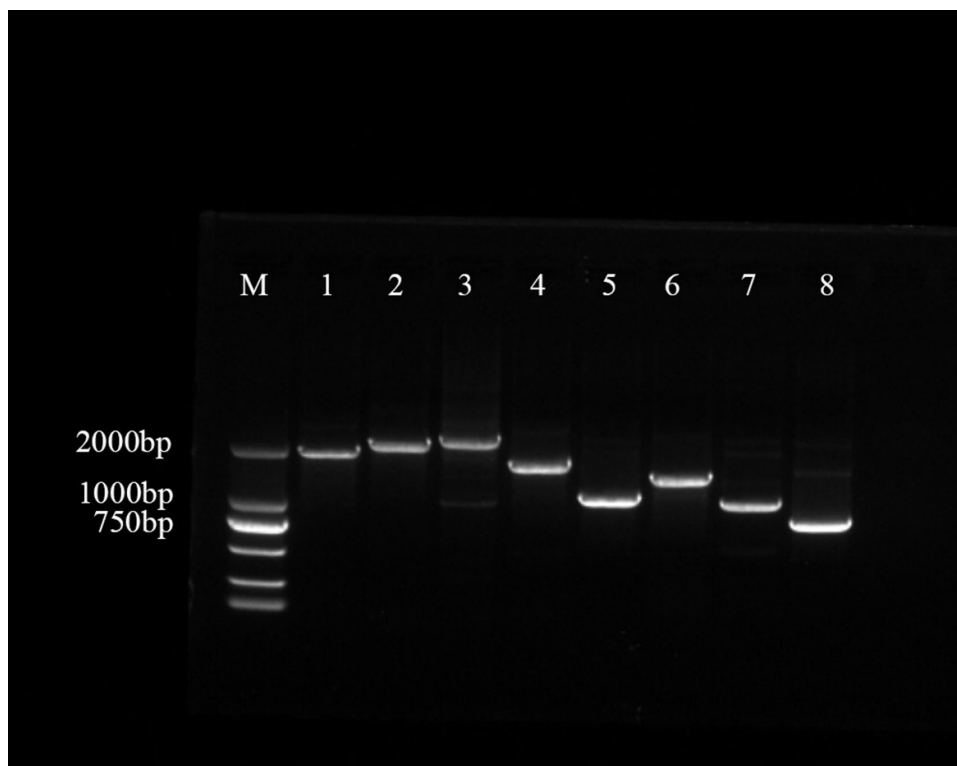

**Figure S1.** TF open reading frames (ORFs) were amplified by RT-PCR and then electrophoresed on a 0.1% agarose gel

a

```

>PlantCARE_7091
+ GAGGAGCCTT AGGTGAGTGC AAATGCTTT AAGAGATGAA TAGGGGTGAG ATGGGTATTA GATTGAAAAA
- CTTCTGCTTA TCTCATCAGG TTACAGGAAA TTCTCTATTT ATTCCGACATC TAGCCATATAT CTACCTTTTT
+ GGAAATTTGAA CAGGAGACAA ATTTATCTAA TGTAAAGAG TAGGTTGAGA GAGAGAGAAA GTTGTAAATAT
- CTTTAACTTT GTCTCTCTGT TAAATGATAT ACATTTTTCG ATTCCTACTCT CTTCTCTTTT CAGACTTTTA
+ ATTTCTGTCA CATGTATGTT AAATAGGAAA AAGGATGCCC GGAAGTCCAC TAGCCCCACA AGCTGGCTGC
- TAAAGCAAGT GTACATACAA TTATCTCTTT TTCCCTAGCG CTTTCAGGTG ATCGGGGTGT TCGACCGAGC
+ CCACGAGACC AGTGTGTGAG AAATATCGAG CAATTTCTCA CTTTTATCT TATTATTTTT TTTTGAAG
- GGTGTGCTGG TCAACATCTC TTTTAGCTCT GTTAAAGAGT GAAAAATAGA ATAATAAAAA AAAACATTTT
+ TCTTAAATTA AAGTGAAGAG TTAAGTGTG TTTTCTTCTC TTTTCTCTCA TGATCTCTGG CGTGAGGCTG
- AGAATTAATY TTCACTTTTC AATTTACAC AACAAAGAG AAAAGGAGGT ACATGGAGAC SCATCTCGAC
+ GGGGAGCAGC TCACTGCTCT TATCTCTGTT AAATATATA GATTACAAAT AGTCAAAAT AGATTAAGT
- CACCTGTGTC AGTGAACGGA ATAGACACA TTAAATATAT CTAAATGTTA TCAATTTATA TCTCATTTGA
+ GCTTACGATA TCGGTGATA ATAGCTCCAT TGATGAGTGG AGTTGCTGT ACTGCTTCCA ACATTTCTTT
- CATTTCTGAT ASCACATAT TATGAGGTA ACTACTTACC TCAGAGGACA TGAGCAAGTT TGTTAAGGAA
+ GAGCAGCAGC TACACATGA AGTCCAAAAA AAGAGTGCAT CTATATATAT TAATAGGAAA ATACTTACA
- CTGCTGTGTC AGTTGTACT TCAAGTTTTT TTCTTCAAGT GAACTACTATA ATTAATCCCT TATGGAATGT
+ CGAGAGCAGG CAGAAAGTA TAATGAGATA ATATGCTTCT TGAGGTTTTT CTTAACTGAT AATACAGCT
- GCTCTGTGTT GTCTTTCTAT ATACTCTAT TATACAGAA ACTCCAAAA GAATTTGATC TTTAGTGCGA
+ TACCCTACTT TACATAGAT TCTGAATAT TATGATGCTT CCTTTGTTT TTAGTGCAAT CTTTATTTAC
- ATGGGTGAGG ATGATCTTA AGGACTTTAA ATCATCAGAA GGAACAAAAA AATCACTGAA GAATAAATG
+ GACTGTTCAG TTGAGAAAA CTTAAGAGG GTGATATATT ATGCTATATA CAGCTTTTCA CTAGCTTGA
- CTGCAAAATG AACTCTTTTT GAATTTCTTC CACTATATA TACAGTATAT GTGAGAAAGT GATCGAATCT
+ GAACTCAATT TCTATTGAA ACACTTTTAA TTATGTTGCA CGAGGCCCTT TGTTTGAGCA AAATTTGAG
- CTTTGAGTAA AAGATAACTT TGTAGAAAT AAATCAAGCT GCTCCGCGAG ACAGACTGCT TTAAACTTC
+ TAGTGTATAT GCTATATAT GTACAGTACT TAATCTATT AAATATAT TATCTTTTGA AAATGTTTA
- ATCACTATA CAGTATATA CATCTGATA ATGTATATAA TTGTATATAA ATAGGAAACT TTTCAAAAT
+ AAAAATTAAT GTATCATATC ATATACAGTT TTTTATTTT TTAAAGAAA ATTCATTGTC CATATATAGC
- TTTTATTA TAAGTATAG TATATGTCAA AAATATATAA AAATCTTTT TAAATTAAGC GTATATAGC
+ CTCTCTCAG CCTCTGATG AAAACCTTCT CTCTTCTGCG GATATCTGG GATGTTCTAA AAGTCAGGCC
- GAGAGAGATC GGGAGCTACT TTTTGAGGA GAAATAGAG GCTATAGACC CTACCAAGTT TTCACTCGCG
+ TTAACATATT ATTTCCATT ATTTAAAGT ACAAGAGGA GCACTGACA ACACCTTATA ATTTCTTTTA
- AAGTGTGTA TAAAGGATA TAAATTTTCA TGTTCTCTCT COTGGACTGT TGTGAAATAT TAAAGAAAT
+ TTAAGATAT TAAATGATA AATTAGATAT CCTCTCTAT CCACACTCTC TCATCCATTC TGCTTTAACA
- AATTTCTATA GTTACTAAT TTAATCTATA GAGAGAGATA GGGTTGAGGA AGTAGGTAGG ACGAAATGT
+ ACGTATAAAA TATGTTTTGG CAGAGCTTAA CTGCTTAATC ACTTAGGCGA CAGTGTGCCC GAATGTGTG
- TGCAATATTAT ATCAAAAGCC GGTCTCGATT GACCAATGAT TGAATCGGCT GTACACACGG CTTTACACAC
+ ACTAAGGAAA ACTGTGCCAG ACTGTGGGGG AGGGGGGCGAG CGGGGCAATC GGGTGGCGAG CGCCCTGGCG
- TGAATCTTTT TGGCGCGT 198ACCCCGG TCCCCCGCTC CGCCGTTAG CCCACCCCTC SCCCGGACCG
+ TGCTATATAT ACCTCTCGAG GTGACGCCUC TTITGGCCCA CAAATATAGT CTCTGTCTCT GTTCTTTTGA
- ACATATATA TGGAGGCTC CATCTCGGGG AAAACCGGCT GTTTTATTA GAGAGACAGA CAGAGAACT
+ TCTCTTTT TACTCAGCTC TCTCAT
- AGAGCAAAAT ATGAGTGGAG AGAGTGA

```

b

```

>PlantCARE_4244
+ GGCTTAGTCC ATTCAGGTGT AGCTTAGCTA ACCAGTTTTG TTAATCTTAA TTTCATTAGG GATTAAATGG
- CCGAATCAGG TAGGTTTACA TCGAATCGAT TGGTCAAAAC AATTAGAAAT AAGATTAATCC CTAAATACCC
+ CTGGGGTAT TTTCAGGGA ATATATATAT GCATGATAT CCACCTGGAC GGACATTTGA TTGGGTAACC
- GAGCCCACTA AAGCTGCCCT TATTATATAA GTACTATAA GGTGAGCTTG CTTGTAACT AGGCATTG
+ CGGGTAGATT CATCAATCT CGAGTGGATC AATGACAST GCTGAGAGT TAGGAAATTC ACTCTTTTCC
- GCCCACTCAA GTAGGTAGA GTCACTTATG TTACTTGCTA CGACTCTCA ATCTTTTAG TGGAGAAAGG
+ TGCTTATTT TTGTAGTAA GCAATCTGA GCAATTTCAA TTGGCCCACT GTCTAGGTTC TCTTATGCTT
- AGTCAATAA AACATCGATT CGGTAGCAT CGTTAAGTT GAGCGGGTGG CAGATCCAG AGATATGAA
+ ACGGATCAAC TACATGCTCA TTTTGTGTT TTCTTTTTCG TTTTGAATGA TAGATATAGC TGACCATATA
- TGCTTAGTTG ATGTACGAGT AAAACACAA AAGAAAACG AAAACTAAT ATCTATATG 1AGTGGATAT
+ AGGCTAGAGA ACCTGTGCC TTTCACATC TTGCACATAT AGATGCCAT TAGACCAATG GCCATTGAAA
- TCCGATCTCT TGGACACCG AAAAGGTGAG AACCTGAATA CTCTACGTA ATCTGTTTAC CGGTAACTTT
+ ACTTATATCT AGTGCCTTAA GCCCATCTA GCTGGGATTT CCACCACTAC GTAACTGTTT CCGAGCAACG
- TGAATATAA TCACGGAATC CGGTACAGAT CGACCCATAA GGTGTGTATG CATTAGCACA GGTCTGTTTC
+ TTACGGTTTG GGCACATAA AAGATCAGA ACTTGGATAG GACTTTCCCG GGAGCTTATA GTTTTGATT
- AATGCCAAAC CGGTTTAA TTTAGTACT TGAACCTATC CTGAAGGGGC CTTGGATAT CAAACCTAA
+ TGAGTAGGC TAATGAGAGG GAGACTGTT ACAGAGCCC AACCTATG TGCGAGGAG TGCGCAATG
- ACTCAATCG ATACTCTCT CTCTGAACA TGCTTGGGG TTGAGATAAC AGCTCTCTC AGCGGTTAC
+ ATATATATA GAGAGGTTG CATTTTAA GGTCTAAT GTCCCAATC AGAAGCATC AGATAGTCC
- TATATAATT CTCTTCAA GTAAATGTT GCAATATA CCGGTTTAT TCTTCTGAT TCTATGAGC
+ TTGATCTGTT ACATGCTCTT CAGTGTGG CTTGTCTTA CAATCAATC ACATTTATA AAAATTTCAA
- AACTAGGCA TGTACAGAA GTACACACC GGAACAGAT GTTTAGTAT TGTCAATAT TTTTAAAT
+ AATATCTCA TGCTTTTTC AGCCGAGCT ACATTAATAG AGCTACTCT CCGATCTCT GAGCACTGT
- TTAGAGCTC ACGAAAAG CGCGCTCA TGTAAATATC TCGATATGA CCGTAAAG CTTGTGACA
+ TGACCAAAA CAGCAATAC TTTAATACC AGTCCATTC ATCCACTCT TGTCAATAG CCGTGCAC
- AACTGGTTT GTGCTTATG AAATATAG TCAAGTATG TAGGTGAGA ACAGTATTC CCGACTG
+ TGTCTTAG AACATCTCAT TGCTGCGAT CAGACACTC GACCAACAA ACCCAACAA GACCGGCTC
- AACAGATTC TTGAGCTA ACAGGCTCA GTGTGCTCA CTGGTTTGT TTGGGTGTT CTGGCGGCG
+ TCAAAAGAT TCCCGACA CACCAATA ATGCAAGT CCAACATA AAGATAGAC ATATGTTAG
- AGTTTTTAA AGGGCTGT GTGTGTAT TACGTGCA GGTCTGAA TCTTATCTG TATCAAACT
+ TTGTAGCAA GGGCGAGC CAGGCTCAA TGCTTGGAG GGGCTGGT GAAATATAT AAGATATCT
- AAGCATGTT CCGCTCTCG GTTCAAGT ACGAACTTC CCGGACCCA CTTTATATA TTTCTATGA
+ CAGCAGCAG GCGCTTTT TCTTGTCT TTTTAAATG CCGTGAAT TAAATTTT AAGGGGAGA
- GTCTGCTTC CCGGCAAAA AGAAGGAAA AAATATAGT GGCATTTAA ATTTAAGAT TTCCCTCT
+ AATTTGAAT TTAGGAGAA AAATATATA GAGAGAAAT ATTCCTAT AAATCAAT TGAAGATCT
- TTAAGCTTAT ATCTCTCT TTTTAAAT CTCTTCTA TACAGTAT TTAGGTTT ACTCTTAA
+ TAGGTTTT ATAAATGAC AAATATCAA ATTTAAAT CTAAGGAT TATAGTTAA TTTTITAGG
- ATCCCAAG TATTAAGT TTTATAGT TAAATTTAA GATTTCTTA ATATCAAT AAAAATCTCC
+ AAATATAA TTAATATAT AAGCATTT CATAAAGAG ATGTTTAT GTTGAGAT GTTATCTG
- TTTTATAT AATTTATC TGTATAGAG CTATTTCT TACAAATC CACTCTCA CAATAGAAC
+ TAACTTTCA TCAATATT GAGCAGCT AATTTGCT TAGGAAAGT AGGATCAAT AAGAGTAT
- ATTTGAAAT AGTTATTA CTCTCTGAC TTAACCTTA ATCTTTTAC TCTTATTA TCTTCAAT
+ CAGATGCAA GCTATGCG TTGGAGGTA ATAAATGAG TGGTAACT AATAATGA TACTCTAT
- GTCTAAGTT CATAACCG AACCTCCAT TATTTACTC ACCCATCT TATTTACT AATGAGTAA
+ TATATTCG GTTAGGAT ATATGTTAA TGCTTGGT TCAATCTAG TTTAAATG TATGCGTT
- ATATAAGC CATCCATA CATTAAT ATCAACCCA AGTTAGCTC AAATTTAGC ATTAACCAA
+ GATTCATCT AGGTGGAG GCGCTGAT TTTTATATA GTAGCTTAA TGAATATAT TGTATACCC
- CTAGTTTAA TCCCATCT CCGGACATA AAAATATAT CATCGAAT ACTATATTA ACATATGAG
+ TAGGAAAT GGGAGCTACC GGCCAAGG GCGCGGCC AGCGCGCT CCCACCA 1AGCTCTG
- ATCTTTTAA CCTCTAGG CCGGTTTCC CCGTCCCG TGCGGGCGA GGTGGGTG ATCGAGCG
+ CAGTTTGA ATCAAAATG GCAAGCTCT TCTTCAAG AATTTGCTA TAGTGTCCA CTAATGCTC
- GTGCAACT TAGTTTATC CCGCGAGG AGGAGTTT TTAACAGT ATCGAGGTT CATACCCA
+ GGCATCAA ATGTATAT GATTCGACA TTAAGGTA TATATGCT CATATGCC ATCACTTAT
- CCGAATTT TACAATATA CTACGTTG AGTTTCTAT ATATACATA GTATTACGG TAGTGAAAT
+ TTGGTAAAG AATTTCTATA ATGAGGTG ATGAATGTA GTAAATGATA ATTTCTCA ATAGTATCT
- AACCTTTT TTAAGATAT TACTCTCAG TACTTACT CATTTATAT TAAAGAGCT TATCATAGA
+ CATCTATCA CCGAATG ATAAATTTA GATAGATA TCTAGATC GATCTAT TGGTACTCA
- GTGATAT GGCATTAAT TATTAATAT CTATCTAT AGATCTTAT CTAAGTAA CCAATAGAT
+ AAGTGGTT GACTCTCAT GTTTTACT CTCTCATCA TCAAGTGA CTAAGTGA CAGTAAAG
- TGTCCCAA CTGAGGTA CAAATGAA GAGGGTAT AGTTCAT CATGATCT GTTCTTCT
+ AGAAGATGA AATCTCAT GTAGAAAT CTCTAAGT AAGTATGCG TCTTAAAA TTAATATAT
- TCTCTCAT TTATAGTA CATCTTAA GAGGATCAG TTATACCG AGAATTTT AAATTTATA
+ GTAGTATC ATGAGCAT ATGACCTTA TAAAGGAGC GAGACACT CACTCTAT CCACTATC
- CATGATAG TAGTGTAT TAGTGTAT ATTTCTCG CTCTGTGAG GTGAGATTA GGTGATAG
+ CTACATCT TTGCTACT CTGTGTG CAGAGTATA TCTCTAGT TAAAGGTT ACTCTCTCA
- GATGTAGAA AACATGAG GAAACACG TGCTTCTAT AGGATGCA AAGTCAAA TGAAGGAT

```

Figure S2. Detection of G-box elements of *SaSsY* ((a) G-box marked blue) and *SaCYP736A167* ((b) G-box marked pink) promoter.



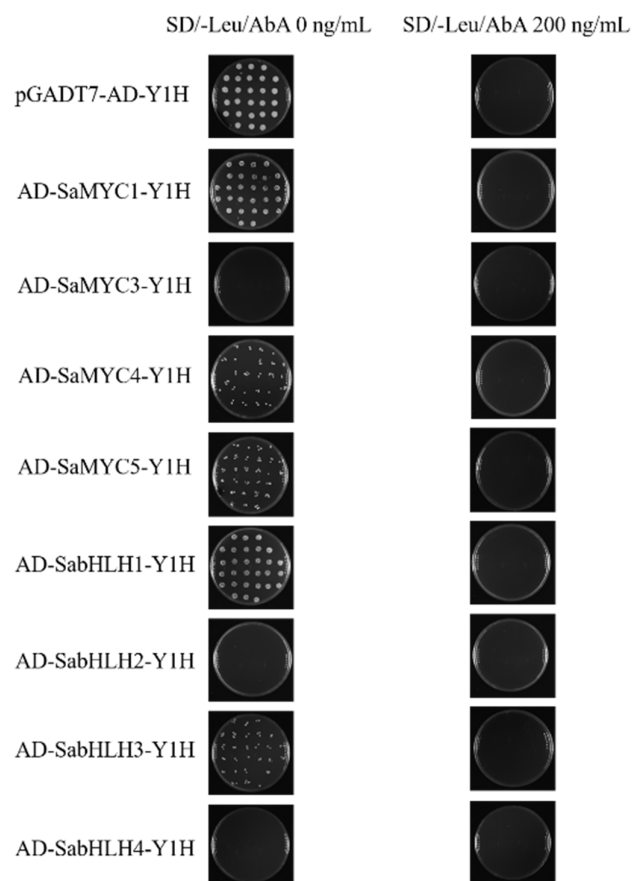

**Figure S3.** Transcription factor activity verification.

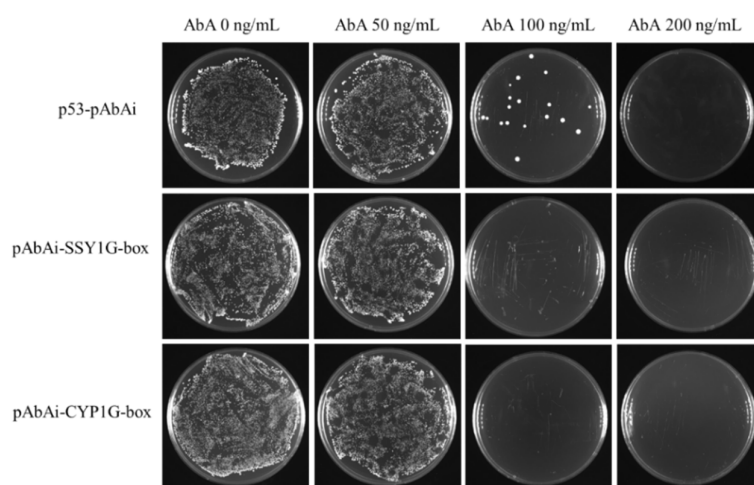

**Figure S4.** Screening of the inhibitory AbA concentrations of bait strain. Note: p53-AbAi was the positive control; pAbAi-SSy1G-box was the G-box element strain of *SaSSy*; pAbAi-CYP1G-box was the G-box element strain of *SaCYP736A67*; the SD/-Leu selection media with AbA concentration of 0 ng/mL, 50 ng/mL, 100 ng/mL, 200 ng/mL, respectively.

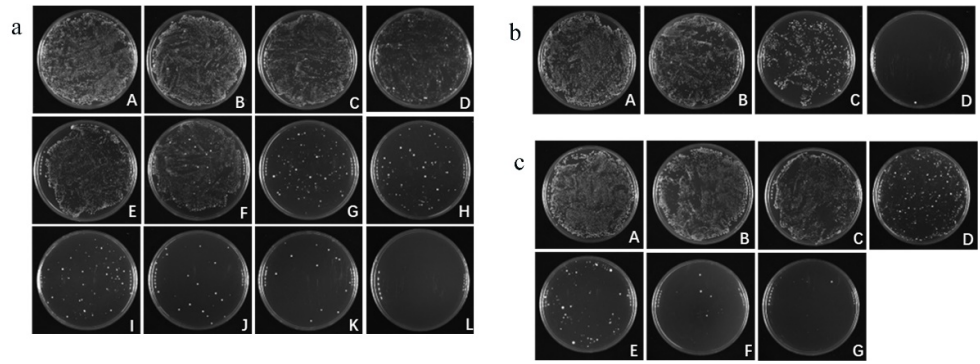

**Figure S5.** Screening AbA concentration of mutant G-box element bait strain. (a): Screening of the lowest inhibitory AbA concentration of mutant bait strain pAbAi-mSSy1G-box; (b): Screening of the lowest inhibitory AbA concentration of mutant bait strain CYP3G-box; (c): Screening of the lowest inhibitory AbA concentration of mutant bait strain pAbAi-mCYP3G-box. A-L: The SD/-Leu selection media with AbA concentration of 0 ng/mL, 50 ng/mL, 100 ng/mL, 200 ng/mL, 300 ng/mL, 400 ng/mL, 500 ng/mL, 600 ng/mL, 700 ng/mL, 800 ng/mL, 900 ng/mL, 1000 ng/mL, respectively.
